# Supplementary material for: Molecular species composition of polar lipids from two microalgae Nitzschia palea and Scenedesmus costatus using HPLC-ESI-MS/MS
Source: PeerJ journal article supplement (doi:10.7717/peerj-achem.27), 2023-09-11
Supplement: Raw_data.xlsx [file Raw_data.xlsx]

## Sheet: S costatus 
	Molecular species	MW (Da)	A	B	C	Mean (nmol.mg-1)	SD	%RSD		PLFA	A	B	C	Mean (nmol.mg-1)	SD	%RSD
	PE(18:1/16:1)	715	0.0207912	0.022133	0.0351516	0.0260253	0.00793208	0.304783		14:0	0	0	0	N.D	N.D	N.D
	PE(18:1/18:1)	743	0.01	0.0141093	0.0239945	0.0160346	0.00719314	0.448602		16:0	1.70426	1.75085	1.83111	1.76207	0.0641648	0.0364144
	PE(18:1/18:2)	741	0.0552239	0.0670194	0.097567	0.0732701	0.0218526	0.298248		16:1	0.877156	0.903497	1.04173	0.940795	0.0884017	0.0939649
	PE(18:1/18:3)	739	0.154652	0.128275	0.221532	0.168153	0.048072	0.285882		16:2	0.280932	0.328135	0.342683	0.31725	0.0322826	0.101758
	PE(18:2/18:3)	737	0.280695	0.252405	0.452309	0.32847	0.108177	0.329336		16:3	0.780432	0.607975	0.565987	0.651465	0.113645	0.174445
	PE(18:3/18:3)	735	0.209128	0.16289	0.297979	0.223332	0.0686554	0.307414		16:4	3.58815	3.6464	2.93352	3.38935	0.395842	0.11679
	PG(16:0/16:0)	722	0.0266371	0.0263672	0.0318266	0.028277	0.00307701	0.108817		18:0	0	0	0	N.D	N.D	N.D
	PG(16:1/16:0)	720	0.0329818	0.0343557	0.0358758	0.0344044	0.00144763	0.0420768		18:1	1.44337	1.4335	1.66514	1.514	0.13098	0.0865125
	PG(18:1/16:0)	748	0.592059	0.617383	0.668261	0.625901	0.0388085	0.0620041		18:2	1.51473	1.42032	1.73874	1.55793	0.163545	0.104976
	PG(18:2/16:0)	746	0.333514	0.363853	0.402968	0.366778	0.0348193	0.0949329		18:3	7.01239	6.64233	6.44138	6.6987	0.289645	0.043239
	PG(18:3/16:0)	744	0.283458	0.312399	0.293658	0.296505	0.0146791	0.0495071		18:4	0.0122445	0.0112304	0.0117902	0.011755	0.00050798	0.0432138
	PG(18:4/16:0)	742	0.0122445	0.0112304	0.0117902	0.011755	0.00050798	0.0432138		20:0	0	0	0	N.D	N.D	N.D
	PG(16:1/18:1)	746	0.108357	0.118306	0.123771	0.116811	0.00781512	0.0669039		20:1	0	0	0	N.D	N.D	N.D
	PG(16:1/18:2)	744	0.0745876	0.0959228	0.0992512	0.0899205	0.0133826	0.148827		20:2	0	0	0	N.D	N.D	N.D
	PG(16:1/18:3)	742	0.311184	0.289536	0.316455	0.305725	0.0142655	0.0466612		20:5	0	0	0	N.D	N.D	N.D
	PG(18:1/18:1)	774	0.0116445	0.00964847	0.0147323	0.0120084	0.0025614	0.2133		22:6	0	0	0	N.D	N.D	N.D
	PG(18:1/18:2)	772	0.0161529	0.0133393	0.0118123	0.0137682	0.00220183	0.159922
	PG(18:3/18:1)	770	0.0158971	0.01463	0.0132208	0.0145826	0.00133876	0.0918055
	PG(18:3/18:2)	768	0.00803489	0.0130121	0.0119008	0.0109826	0.00261256	0.237881
	PG(18:3/18:3)	766	0.0062518	0.0121031	0.0111191	0.00982466	0.00313306	0.318897
	PC(16:0/18:2)	758	0.00509812	0.00401612	0.00582103	0.01	0.00090839	0.090839
	PC(16:0/18:3)	756	0.08504	0.0518776	0.0734902	0.0701359	0.0168337	0.240015
	PC(18:1/18:3)	782	0.0801225	0.0478559	0.0952744	0.0744176	0.0242185	0.325441
	PC(18:2/18:3)	780	0.271302	0.191341	0.217665	0.22677	0.0407506	0.1797
	MGDG(18:3/16:3)	746	0.221433	0.135311	0.0989958	0.151913	0.0628844	0.413949
	MGDG(18:3/16:4)	744	3.36754	3.39502	2.7382	3.16692	0.371538	0.117319
	DGDG(16:0_18:1)	918	0.093065	0.0967755	0.0781843	0.0893416	0.00983899	0.110128
	DGDG(18:2/16:0)	916	0.0810682	0.0793975	0.079282	0.0799159	0.000999541	0.0125074
	DGDG(18:3/16:0)	914	0.132456	0.126825	0.118124	0.125801	0.0072206	0.0573968
	DGDG(16:1/18:1)	916	0.107943	0.0821533	0.108241	0.0994455	0.0149763	0.150598
	DGDG(16:1_18:2)	914	0.0676641	0.0802197	0.103217	0.0837004	0.0180304	0.215416
	DGDG(18:3/16:1)	912	0.153648	0.18087	0.219771	0.184763	0.0332328	0.179867
	DGDG(18:1/16:2)	914	0.0643382	0.0569997	0.0669967	0.0627782	0.00517784	0.0824783
	DGDG(18:2/16:2)	912	0.0785028	0.0680059	0.088697	0.0784019	0.0103459	0.13196
	DGDG(18:3/16:2)	910	0.138091	0.203129	0.186989	0.17607	0.0338663	0.192346
	DGDG(18:1/16:3)	912	0.075869	0.0827964	0.0576729	0.0721128	0.0129761	0.179942
	DGDG(18:2/16:3)	910	0.143935	0.101214	0.111416	0.118855	0.0223109	0.187715
	DGDG(18:3/16:3)	908	0.339195	0.288654	0.297902	0.308583	0.0269103	0.0872059
	DGDG(16:4/18:2)	908	0.0175199	0.0233555	0.0172773	0.0193843	0.00344137	0.177534
	DGDG(16:4/18:3)	906	0.20309	0.228025	0.178042	0.203052	0.0249919	0.123081
	DGDG(18:3/18:1)	940	0.0156079	0.0383207	0.01	0.0213096	0.0149966	0.703749
	DGDG(18:3/18:2)	938	0.0989485	0.0905765	0.0568313	0.0737039	0.0238614	0.323747
	DGDG(18:3/18:3)	936	0.210616	0.15214	0.111416	0.131778	0.0287959	0.218518
	SQDG(32:0)	795	0.419713	0.403708	0.617728	0.480383	0.119213	0.248163
	SQDG(32:1)	793	0.0793339	0.0698283	0.0712379	0.0734667	0.0051298	0.0698249
	SQDG(34:0)	823	0.0596651	0.0502668	0.0564525	0.0554615	0.00477689	0.08613
	SQDG(34:1)	821	0.858085	0.841661	1.07164	0.923796	0.128302	0.138885
	SQDG(34:2)	819	0.436876	0.446853	0.587997	0.490575	0.0845167	0.172281
	SQDG(34:3)	817	1.34537	1.27423	1.5198	1.3798	0.126352	0.0915729
	SQDG(34:4)	815	0.149892	0.146587	0.156344	0.150941	0.00496243	0.0328767
	SQDG(36:1)	849	0.0469345	0.0502666	0.0532607	0.050154	0.00316461	0.063098
	SQDG(36:3)	845	0.0588553	0.0541284	0.0693384	0.060774	0.00778439	0.128088
	SQDG(36:4)	843	0.0441643	0.0410515	0.0543565	0.0465241	0.00695935	0.149586
	SQDG(36:6)	839	0.126962	0.118011	0.140009	0.128327	0.0110622	0.0862033
	∑ PE		0.73049	0.646832	1.12853	0.835285	0.257382	0.308137
	∑ PG		1.833	1.93209	2.04664	1.93724	0.106913	0.055188
	∑ PC		0.441563	0.295091	0.392251	0.376302	0.0745272	0.198052
	∑ MGDG		3.58897	3.53033	2.83719	3.31883	0.418142	0.125991
	∑ DGDG		2.02156	1.97946	1.89006	1.96369	0.0671513	0.0341965
	∑ SQDG		3.62585	3.49659	4.39816	3.8402	0.487511	0.126949

## Sheet: N palea
	Molecular species	MW (Da)	A	B	C	D	E	Mean (nmol.mg-1) b	SD	%RSD		PLFA	A	B	C	D	E	Mean (nmol.mg-1)	SD	%RSD
	PE(16:0/16:1)	689	0.314073	0.598824	0.542782	0.628963	0.90242	0.597412	0.210531	0.352405		14:0	0.1	0.1	0.1	0.1	0.228565	0.125713	0.0574961	0.45736
	PE(16:1/16:1)	687	0.394657	0.905033	0.452612	0.820566	1.24612	0.763797	0.349608	0.457724		16:0	0.855072	1.25108	0.829733	1.10222	1.76217	1.16006	0.379573	0.327202
	PE(18:1/16:1)	715	0.199369	0.485708	0.249266	0.386371	0.544574	0.373058	0.148136	0.397087		16:1	3.18234	5.37047	3.12753	4.61716	7.44074	4.74765	1.78414	0.375795
	PG(16:1/14:0)	692	0.1	0.1	0.1	0.1	0.228565	0.125713	0.0574961	0.45736		16:2	0.12	0.174243	0.150377	0.163478	0.363045	0.194228	0.096536	0.497023
	PG(16:0/16:1)	720	0.540999	0.652258	0.286951	0.473262	0.859752	0.562644	0.212584	0.377831		16:3	0	0	0	0	0	0	N.D	N.D
	PG(16:1/16:1)	718	0.202823	0.384636	0.158761	0.233021	0.352289	0.266306	0.0975947	0.366475		16:4	0	0	0	0	0	0	N.D	N.D
	PG(18:1/16:1)	746	0.312361	0.479269	0.1794	0.348132	0.582414	0.380315	0.155448	0.408735		18:0	0	0	0	0	0	0	N.D	N.D
	PG(20:5/18:1)	794	0.1	0.1	0.1	0.1	0.1	0.1	0	0		18:1	0.61173	1.06498	0.528666	0.834502	1.22699	0.853373	0.295189	0.345909
	PC(20:5/16:1)	778	0.146301	0.053685	0.0984377	0.0924505	0.368219	0.151819	0.125363	0.825744		18:2	0	0	0	0	0	0	N.D	N.D
	PC(20:5/22:6)	852	0.1	0.1	0.1	0.1	0.127067	0.105413	0.0121048	0.114832		18:3	0	0	0	0	0	0	N.D	N.D
	MGDG(20:5/20:2)	828	1.48026	2.65646	1.5873	2.57749	5.00058	2.66042	1.41665	0.532492		18:4	0	0	0	0	0	0	N.D	N.D
	DGDG(16:1/16:1)	916	0.12	0.12	0.12	0.12	0.192254	0.134451	0.032313	0.240333		20:0	0.12	0.12	0.142633	0.124558	0.252876	0.152013	0.0571505	0.375957
	DGDG(20:5/16:1)	936	0.134276	0.181388	0.207943	0.240811	0.373475	0.227578	0.0903954	0.397205		20:1	0	0	0	0	0	0	N.D	N.D
	DGDG(20:5/16:2)	934	0.12	0.174243	0.150377	0.163478	0.363045	0.194228	0.096536	0.497023		20:2	1.48026	2.65646	1.5873	2.57749	5.00058	2.66042	1.41665	0.532492
	DGDG(20:5/20:0)	994	0.12	0.12	0.142633	0.124558	0.252876	0.152013	0.0571505	0.375957		20:5	2.20084	3.38578	2.3867	3.39879	6.58527	3.59147	1.76264	0.490785
	SQDG(30:1)	765	0.0675735	0.05	0.05	0.0740222	0.05	0.0583191	0.0116174	0.199203		22:6	0.1	0.1	0.1	0.1	0.127067	0.105413	0.0121048	0.114832
	SQDG(32:0)	795	0.0813107	0.102316	0.0737464	0.0939163	0.0683895	0.0839358	0.0140521	0.167415
	SQDG(32:1)	793	1.07929	1.23189	1.01825	1.67722	0.720173	1.14536	0.350594	0.306099
	SQDG(32:2)	791	0.139366	0.185573	0.151574	0.193956	0.108147	0.155723	0.0350036	0.224781
	SQDG(34:5)	813	0.0670004	0.05	0.05	0.06897	0.05	0.0571941	0.00987547	0.172666
	SQDG(36:4)	843	0.05	0.05	0.05	0.0664905	0.05	0.0532981	0.00737479	0.138369
	SQDG(36:5)	841	0.120688	0.158219	0.120522	0.160982	0.104349	0.132952	0.0252346	0.189802
	SQDG(42:5)	925	0.05	0.0683191	0.05	0.05	0.05	0.0536638	0.00819254	0.152664
	∑ PE		0.908099	1.98957	1.24466	1.8359	2.69311	1.73427	0.692307	0.399193
	∑ PG		1.25618	1.71616	0.825112	1.25441	2.12302	1.43498	0.497236	0.346511
	∑ PC		0.246301	0.153685	0.198438	0.192451	0.495286	0.257232	0.137081	0.532907
	∑ MGDG		1.48026	2.65646	1.5873	2.57749	5.00058	2.66042	1.41665	0.532492
	∑ DGDG		0.494276	0.595631	0.620953	0.648846	1.18165	0.708271	0.270982	0.382596
	∑ SQDG		1.65523	1.89631	1.56409	2.38555	1.20106	1.74045	0.43868	0.25205
